# Supplementary material
Source: Springer Nature journal article supplement (https://www.springermedizin.de/resource/supplementary/12957_2011_803_MOESM5_ESM.pdf/9565912)

Recurrence free Survival distribution function

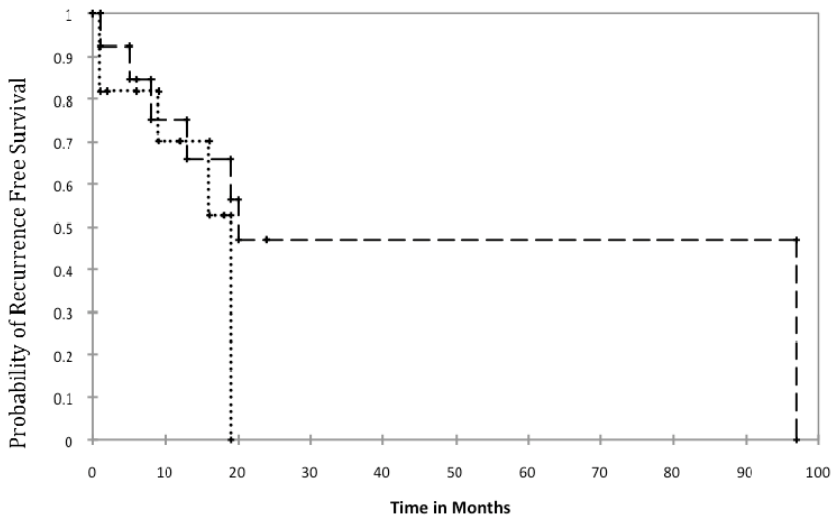

— — — Leiomyosarcoma

..... Synovial Sarcoma

Supplement: MOESM5 [file 9565912]
